# Supplementary material for: Self-propelled worm-like filaments: spontaneous spiral formation, structure, and dynamics
Source: Royal Society of Chemistry journal article supplement (doi:10.1039/c5sm01683e), 2015-01-01
Supplement: c5sm01683e1.pdf [file c5sm01683e1.pdf]

**Electronic Supplementary Information for:  
Self-propelled Worm-like Filaments: Spontaneous Spiral Formation, Structure,  
and Dynamics**

Rolf E. Isele-Holder, Jens Elgeti, and Gerhard Gompper

*Theoretical Soft Matter and Biophysics,*

*Institute of Complex Systems and Institute for Advanced Simulations,*

*Forschungszentrum Jülich GmbH, 52425 Jülich, Germany*

**DESCRIPTION OF THE VIDEOS**

The three videos in the ESI show example simulations of a filament with the same bending rigidity  $\xi_P/L = 0.2$  from the three different filament regimes: the polymer regimes (S1.mpeg,  $Pe = 200$ ), the weak spiral regime (S2.mpeg,  $Pe = 1000$ ), and the strong spiral regime (S3.mpeg,  $Pe = 5000$ ). The filament is in grayscales with the leading tip colored black. The camera moves with the filament; the red points indicate a spatially fixed reference system as a guide to the eye.

**DETAILS OF THE SIMULATION SETUP**

Details of the simulation setup of the free-swimming filaments are summarized in Table I.

| $\xi_P/L = \kappa/(k_B T L)$ | $N$                    | $Pe = f_p/(k_B T L^2)$ | $\Delta t/\tau$        | $t_e/\tau$             | $t_s/\tau$             |        |
|------------------------------|------------------------|------------------------|------------------------|------------------------|------------------------|--------|
| 100                          | 25                     | 0 – 20000              | $8.00 \times 10^{-10}$ | 0.0512                 | 5.12                   |        |
|                              |                        | 50000                  | $2.00 \times 10^{-10}$ | 0.0256                 | 2.56                   |        |
|                              |                        | 100000                 | $1.00 \times 10^{-10}$ | 0.0128                 | 1.28                   |        |
| 40 – 20                      | 25                     | 0 – 2000               | $6.40 \times 10^{-9}$  | 0.0512                 | 5.12                   |        |
|                              |                        | 5000                   | $3.20 \times 10^{-9}$  | 0.0512                 | 5.12                   |        |
|                              |                        | 10000                  | $1.60 \times 10^{-9}$  | 0.0512                 | 5.12                   |        |
|                              |                        | 20000                  | $8.00 \times 10^{-10}$ | 0.0512                 | 5.12                   |        |
|                              |                        | 50000                  | $2.00 \times 10^{-10}$ | 0.0256                 | 2.56                   |        |
|                              |                        | 100000                 | $1.00 \times 10^{-10}$ | 0.0128                 | 1.28                   |        |
|                              |                        | 10                     | 50                     | 0 – 10000              | $8.00 \times 10^{-10}$ | 0.0512 |
| 20000                        | $4.00 \times 10^{-10}$ | 0.0512                 |                        | 5.12                   |                        |        |
| 50000                        | $1.00 \times 10^{-10}$ | 0.0256                 |                        | 2.56                   |                        |        |
| 100000                       | $5.00 \times 10^{-11}$ | 0.0128                 |                        | 1.28                   |                        |        |
| 4                            | 50                     | 0 – 100000             | $8.00 \times 10^{-10}$ | 0.0512                 | 5.12                   |        |
| 2 – 0.2                      |                        | 100                    | 0 – 20000              | $1.00 \times 10^{-10}$ | 0.0512                 | 5.12   |
| 50000                        |                        |                        | $5.00 \times 10^{-11}$ | 0.0256                 | 2.56                   |        |
| 100000                       | $2.50 \times 10^{-11}$ |                        | 0.0128                 | 1.28                   |                        |        |
| 0.14 – 0.1                   | 200                    | 0 – 50000              | $2.50 \times 10^{-11}$ | 0.0128                 | 1.28                   |        |
|                              |                        | 100000                 | $2.50 \times 10^{-11}$ | 0.0064                 | 0.64                   |        |

TABLE I. Details of the simulation settings.  $\xi_P/L$  is the persistence length divided by the filament length,  $Pe$  is the *Peclet* number,  $k_B T$  is the thermal energy,  $\kappa$  is the bending rigidity of the filament,  $N$  is the number of bonds,  $f_p$  is the propulsive force per unit length of the polymer,  $\tau$  is the time that the filament requires to diffuse its own body length,  $\Delta t$  is the timestep of the integrator,  $t_e$  is the equilibration time at the beginning of the simulation that is discarded in the analysis, and  $t_s$  is the simulation time during which data for the analysis is collected.
